# Supplementary material for: Comparison of Leptospira interrogans and Leptospira biflexa genomes: analysis of potential leptospiral–host interactions
Source: Royal Society of Chemistry journal article supplement (doi:10.1039/c6mb00856a), 2017-03-03
Supplement: c6mb00856a1.pdf [file c6mb00856a1.pdf]

## Supplementary Figures

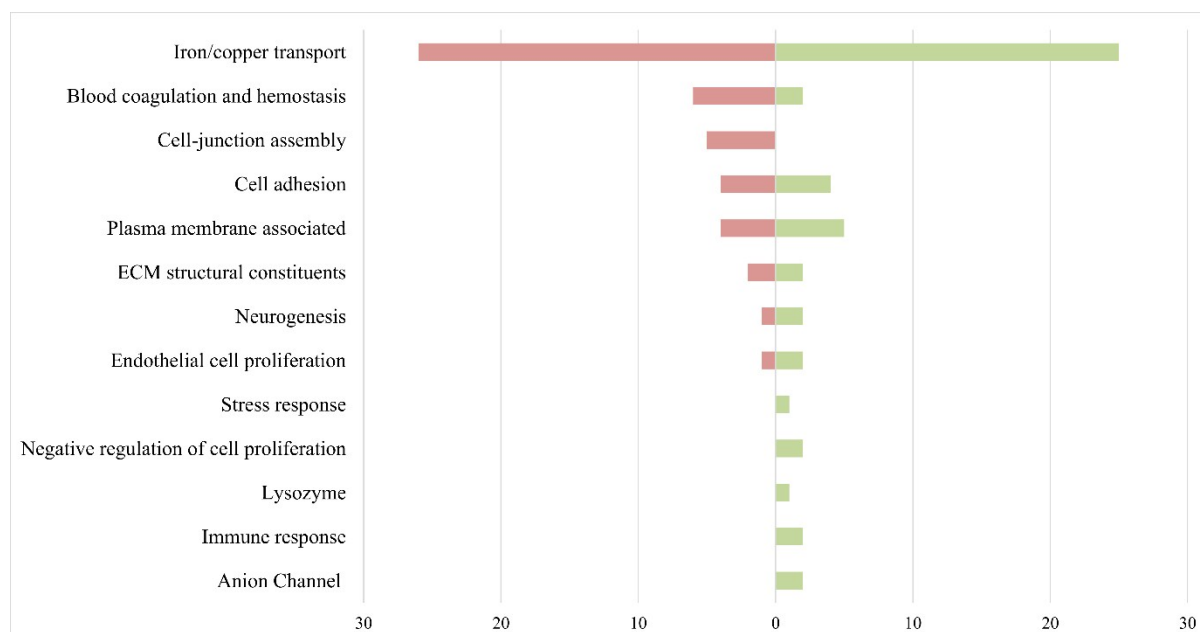

**Figure S1:** Overview on leptospiral-host interactions I. A bar chart representation of number of interactions potentially brought about by *L. interrogans* and *L. biflexa* proteins with human proteins, is shown. Green coloured bars correspond to interactions mediated by proteins of *L. biflexa*, while peach coloured bars denote interactions mediated by *L. interrogans* proteins with human proteins under each functional category of human.

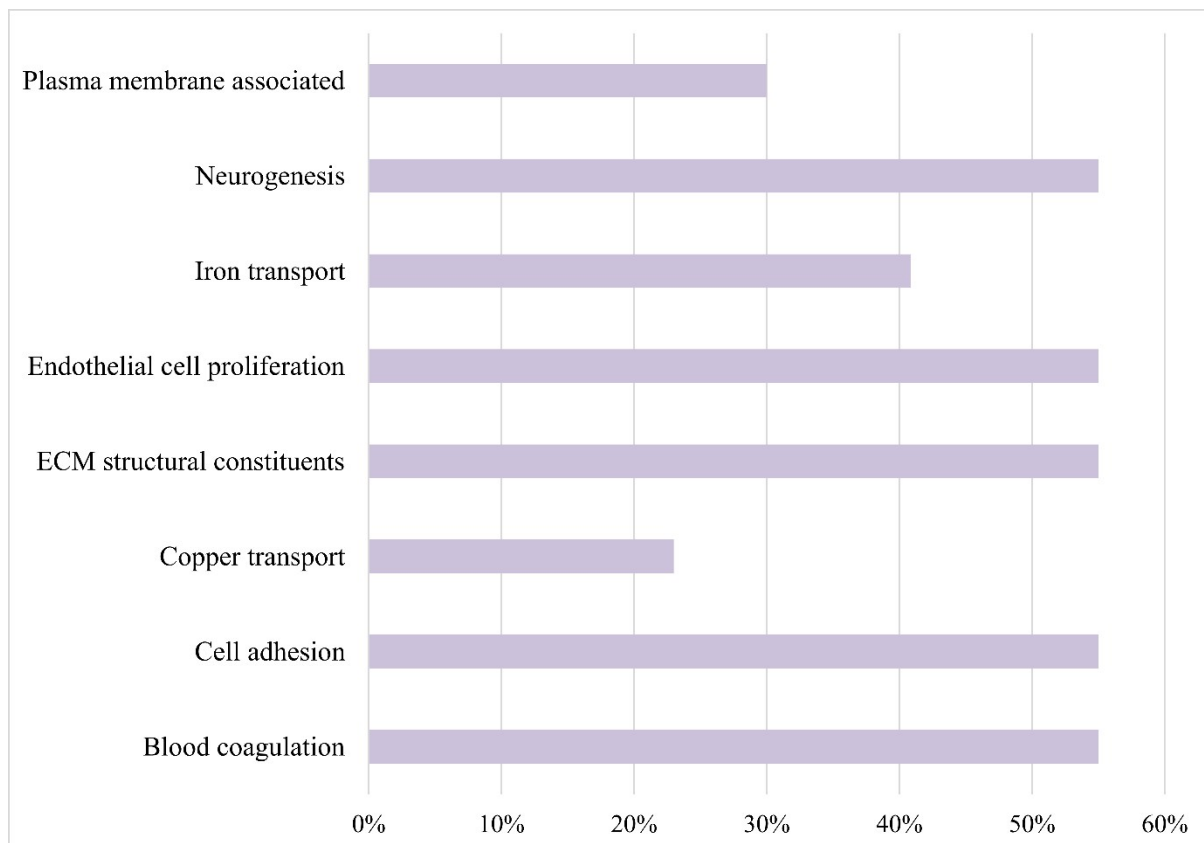

**Figure S2:** Orthologous proteins and their interactions with host. Average sequence similarity of proteins of both the leptospire, *L. interrogans* and *L. biflexa*, potentially mediating interactions under each functional category of human is described.
