# Supplementary material for: Comparison of Leptospira interrogans and Leptospira biflexa genomes: analysis of potential leptospiral–host interactions
Source: Royal Society of Chemistry journal article supplement (doi:10.1039/c6mb00856a), 2017-03-03
Supplement: c6mb00856a2.xlsx [file c6mb00856a2.xlsx]

## Sheet: S1(a)
Supplementary Table S1(a): Details on interactions predicted between proteins of L. interrogans and human host
Uniprot ID	Gene name	Protein description	Function	Subcellular localization	Pfam/SCOP acc. no.	Pfam/SCOP domain (region)	UniProt ID of interacting human protein	Pfam/SCOP acc. no.	Pfam/SCOP domain	Protein description	Function	Subcellular localization	Tissue specificity	Template complex	Sequence similarity score between template and pathogen proteins	Sequence similarity score between template and human proteins	Confidence measure based on sequence identities [Reasonable (>30%), Medium (atleast one= >30%), Low <30%]	TM-score of the template protein structurally aligned with pathogenic protein	TM-score of the template protein structurally aligned with human protein
Q75FE4	LIC_20250	Peptidoglycan-associated cytoplasmic membrane protein	Not known	Outer membrane	d.79.7.1	OmpA-like	O75083	b.68.4.1	WD40 repeat-like	WD repeat-containing protein 1	Maintenance of cell junction assembly, platelet degranulation	cell projection, extracellular region, cell junction	Expressed in all major organs	2HQS	0.412	0.189	Medium	0.85	0.6
Q72LS2	LIC_13479	Peptidoglycan-associated cytoplasmic membrane protein	Not known	Outer membrane	d.79.7.1	OmpA-like	O75083	b.68.4.1	WD40 repeat-like	WD repeat-containing protein 1	Maintenance of cell junction assembly, platelet degranulation	cell projection, extracellular region, cell junction	Expressed in all major organs	2HQS	0.44	0.104	Medium	0.73	0.6
Q72UX0	LIC_10537	Peptidoglycan-associated periplasmic protein	Not known	Outer membrane	d.79.7.1	OmpA-like	O75083	b.68.4.1	WD40 repeat-like	WD repeat-containing protein 1	Maintenance of cell junction assembly, platelet degranulation	cell projection, extracellular region, cell junction	Expressed in all major organs	2HQS	0.303	0.104	Medium	0.64	0.6
Q72VV5	LIC_10191	Peptidoglycan-associated cytoplasmic membrane protein	Not known	Outer membrane	d.79.7.1	OmpA-like	O75083	b.68.4.1	WD40 repeat-like	WD repeat-containing protein 1	Maintenance of cell junction assembly, platelet degranulation	cell projection, extracellular region, cell junction	Expressed in all major organs	2HQS	0.282	0.104	Low	0.63	0.6
Q72W87	LIC_10050	Peptidoglycan-associated cytoplasmic membrane protein	Not known	Outer membrane	d.79.7.1	OmpA-like	O75083	b.68.4.1	WD40 repeat-like	WD repeat-containing protein 1	Maintenance of cell junction assembly, platelet degranulation	cell projection, extracellular region, cell junction	Expressed in all major organs	2HQS	0.279	0.104	Low	0.62	0.6
Q72N40	LIC_12998	TonB-dependent outer membrane receptor	Transport	Outer membrane	PF00593	TonB_dep_Rec	P02787	PF00405	Transferrin	Serotransferrin	Iron transport	Membrane; secreted	Liver and plasma	3V8X	0.238	1	Medium	0.78	1
Q72N40	LIC_12998	TonB-dependent outer membrane receptor	Transport	Outer membrane	PF00593	TonB_dep_Rec	P02788	PF00405	Transferrin	Lactotransferrin	Iron transport	Secreted	Expressed in brain, testis and peripheral blood leukocytes, High levels are found in saliva and tears, intermediate levels in serum and plasma, and low levels in urine. In kidney, detected in the distal collecting tubules in the medulla but not in the cortical region or in blood vessels	3V8X	0.238	0.7	Medium	0.78	0.72
Q72N40	LIC_12998	TonB-dependent outer membrane receptor	Transport	Outer membrane	PF00593	TonB_dep_Rec	P08582	PF00405	Transferrin	Melanotransferrin	Iron transport	Cell membrane	Liver, epithelium, placenta, umbilical cord and sweat glands	3V8X	0.238	0.55	Medium	0.78	0.66
Q72PU3	btuB; LIC_12374	Outer membrane protein, TonB dependent	Transport	Outer membrane	PF00593	TonB_dep_Rec	P02787	PF00405	Transferrin	Serotransferrin	Iron transport	Membrane; secreted	Liver and plasma	3V8X	0.23	1	Medium	0.8	1
Q72PU3	btuB; LIC_12374	Outer membrane protein, TonB dependent	Transport	Outer membrane	PF00593	TonB_dep_Rec	P02788	PF00405	Transferrin	Lactotransferrin	Iron transport	Secreted	Expressed in brain, testis and peripheral blood leukocytes, High levels are found in saliva and tears, intermediate levels in serum and plasma, and low levels in urine. In kidney, detected in the distal collecting tubules in the medulla but not in the cortical region or in blood vessels	3V8X	0.23	0.7	Medium	0.8	0.72
Q72PU3	btuB; LIC_12374	Outer membrane protein, TonB dependent	Transport	Outer membrane	PF00593	TonB_dep_Rec	P08582	PF00405	Transferrin	Melanotransferrin	Iron transport	Cell membrane	Liver, epithelium, placenta, umbilical cord and sweat glands	3V8X	0.23	0.55	Medium	0.8	0.66
Q72TQ3	phuR; LIC_10964	TonB-dependent outer membrane hemin receptor	Transport	Outer membrane	PF00593	TonB_dep_Rec	P02787	PF00405	Transferrin	Serotransferrin	Iron transport	Membrane; secreted	Liver and plasma	3V8X	0.2348	1	Medium	0.81	1
Q72TQ3	phuR; LIC_10964	TonB-dependent outer membrane hemin receptor	Transport	Outer membrane	PF00593	TonB_dep_Rec	P02788	PF00405	Transferrin	Lactotransferrin	Iron transport	Secreted	Expressed in brain, testis and peripheral blood leukocytes, High levels are found in saliva and tears, intermediate levels in serum and plasma, and low levels in urine. In kidney, detected in the distal collecting tubules in the medulla but not in the cortical region or in blood vessels	3V8X	0.2348	0.7	Medium	0.81	0.72
Q72TQ3	phuR; LIC_10964	TonB-dependent outer membrane hemin receptor	Transport	Outer membrane	PF00593	TonB_dep_Rec	P08582	PF00405	Transferrin	Melanotransferrin	Iron transport	Cell membrane	Liver, epithelium, placenta, umbilical cord and sweat glands	3V8X	0.2348	0.55	Medium	0.81	0.66
Q72TY3	LIC_10881	Outer membrane protein, TonB dependent	Transport	Outer membrane	PF07715	Plug	P02788	PF00405	Transferrin	Lactotransferrin	Iron transport	Secreted	Expressed in brain, testis and peripheral blood leukocytes, High levels are found in saliva and tears, intermediate levels in serum and plasma, and low levels in urine. In kidney, detected in the distal collecting tubules in the medulla but not in the cortical region or in blood vessels	3V8X	0.225	0.7	Medium	0.63	0.72
Q72UE3	smc, LIC_10714	Outer membrane receptor protein	Transport	Outer membrane	PF00593	TonB_dep_Rec	P02787	PF00405	Transferrin	Serotransferrin	Iron transport	Membrane; secreted	Liver and plasma	3V8X	0.24	1	Medium	0.7	1
Q72UE3	smc, LIC_10714	Outer membrane receptor protein	Transport	Outer membrane	PF00593	TonB_dep_Rec	P02788	PF00405	Transferrin	Lactotransferrin	Iron transport	Secreted	Expressed in brain, testis and peripheral blood leukocytes, High levels are found in saliva and tears, intermediate levels in serum and plasma, and low levels in urine. In kidney, detected in the distal collecting tubules in the medulla but not in the cortical region or in blood vessels	3V8X	0.24	0.7	Medium	0.7	0.72
Q72UE3	smc, LIC_10714	Outer membrane receptor protein	Transport	Outer membrane	PF00593	TonB_dep_Rec	P08582	PF00405	Transferrin	Melanotransferrin	Iron transport	Cell membrane	Liver, epithelium, placenta, umbilical cord and sweat glands	3V8X	0.24	0.55	Medium	0.7	0.66
Q75FH5	LIC_20214	Uncharacterized protein	Not known	Outer membrane	PF07715	Plug	P02787	PF00405	Transferrin	Serotransferrin	Iron transport	Membrane; secreted	Liver and plasma	3V8X	0.223	1	Medium	0.73	1
Q75FH5	LIC_20214	Uncharacterized protein	Not known	Outer membrane	PF07715	Plug	P02788	PF00405	Transferrin	Lactotransferrin	Iron transport	Secreted	Expressed in brain, testis and peripheral blood leukocytes, High levels are found in saliva and tears, intermediate levels in serum and plasma, and low levels in urine. In kidney, detected in the distal collecting tubules in the medulla but not in the cortical region or in blood vessels	3V8X	0.223	0.7	Medium	0.73	0.72
Q75FH5	LIC_20214	Uncharacterized protein	Not known	Outer membrane	PF07715	Plug	P08582	PF00405	Transferrin	Melanotransferrin	Iron transport	Cell membrane	Liver, epithelium, placenta, umbilical cord and sweat glands	3V8X	0.223	0.55	Medium	0.73	0.66
Q72RQ0	LIC_11694	TonB-dependent outer membrane receptor	Transport	Outer membrane	PF00593	TonB_dep_Rec	P02787	PF00405	Transferrin	Serotransferrin	Iron transport	Membrane; secreted	Liver and plasma	3V8X	0.3	1	Reasonable	0.77	1
Q72RQ0	LIC_11694	TonB-dependent outer membrane receptor	Transport	Outer membrane	PF00593	TonB_dep_Rec	P02788	PF00405	Transferrin	Lactotransferrin	Iron transport	Secreted	Expressed in brain, testis and peripheral blood leukocytes, High levels are found in saliva and tears, intermediate levels in serum and plasma, and low levels in urine. In kidney, detected in the distal collecting tubules in the medulla but not in the cortical region or in blood vessels		0.3	0.7	Reasonable	0.77	0.72
Q72RQ0	LIC_11694	TonB-dependent outer membrane receptor	Transport	Outer membrane	PF00593	TonB_dep_Rec	P08582	PF00405	Transferrin	Melanotransferrin	Iron transport	Cell membrane	Liver, epithelium, placenta, umbilical cord and sweat glands	3V8X	0.3	0.55	Reasonable	0.77	0.66
Q72ND6	LIC_12898	Uncharacterized protein	Not known	OMP-predicted	PF07715	Plug	P02787	PF00405	Transferrin	Serotransferrin	Iron transport	Membrane; secreted	Liver and plasma	3V8X	0.175	1	Medium	0.71	1
Q72ND6	LIC_12898	Uncharacterized protein	Not known	OMP-predicted	PF07715	Plug	P02788	PF00405	Transferrin	Lactotransferrin	Iron transport	Secreted	Expressed in brain, testis and peripheral blood leukocytes, High levels are found in saliva and tears, intermediate levels in serum and plasma, and low levels in urine. In kidney, detected in the distal collecting tubules in the medulla but not in the cortical region or in blood vessels	3V8X	0.175	0.7	Medium	0.71	0.72
Q72ND6	LIC_12898	Uncharacterized protein	Transport (putative)	OMP-predicted	PF07715	Plug	P08582	PF00405	Transferrin	Melanotransferrin	Iron transport	Cell membrane	Liver, epithelium, placenta, umbilical cord and sweat glands	3V8X	0.175	0.55	Medium	0.71	0.66
Q72TW8	fecA; LIC_10896	TonB-dependent outer membrane hemin receptor	Transport	OMP-predicted	PF00593	TonB_dep_Rec	P02787	PF00405	Transferrin	Serotransferrin	Iron transport	Membrane; secreted	Liver and plasma	3V8X	0.21	1	Medium	0.97	1
Q72TW8	fecA; LIC_10896	TonB-dependent outer membrane receptor	Transport	OMP-predicted	PF00593	TonB_dep_Rec	P02788	PF00405	Transferrin	Lactotransferrin	Iron transport	Secreted	expressed in brain, testis and peripheral blood leukocytes, High levels are found in saliva and tears, intermediate levels in serum and plasma, and low levels in urine. In kidney, detected in the distal collecting tubules in the medulla but not in the cortical region or in blood vessels	3V8X	0.21	0.7	Medium	0.97	0.72
Q72TW8	fecA; LIC_10896	TonB-dependent outer membrane receptor	Transport	OMP-predicted	PF00593	TonB_dep_Rec	P08582	PF00405	Transferrin	Melanotransferrin	Iron transport	Cell membrane	Liver, epithelium, placenta, umbilical cord and sweat glands	3V8X	0.21	0.55	Medium	0.97	0.66
Q72M68	nprT; LIC_13322	Thermolysin	Metalloendopeptidase	Extracellular-predicted	PF01447, PF02868	Peptidase_M4 (288-432) Peptidase_M4_C (467-637)	P04275	PF01826	TIL	von Willebrand factor	Blood coagulation, Cell adhesion	Secreted, extracellular matrix	Plasma	3SSB	0.451	0.3	Reasonable	0.86	0.63
Q72M69	LIC_13321	Thermolysin homolog	Metalloendopeptidase	Extracellular-predicted	PF01447, PF02868	Peptidase_M4 (286-422) Peptidase_M4_C (465-635)	P04275	PF01826	TIL	von Willebrand factor	Blood coagulation, Cell adhesion	Secreted, extracellular matrix	Plasma	3SSB	0.454	0.3	Reasonable	0.85	0.63
Q72M70	LIC_13320	Thermolysin	Metalloendopeptidase	Extracellular-predicted	PF01447, PF02868	Peptidase_M4 (286-461) Peptidase_M4_C (464-635)	P04275	PF01826	TIL	von Willebrand factor	Blood coagulation, Cell adhesion	Secreted, extracellular matrix	Plasma	3SSB	0.458	0.3	Reasonable	0.89	0.63
Q72UE2	LIC_10715	Thermolysin	Metalloendopeptidase	Extracellular-predicted	PF01447, PF02868	Peptidase_M4 (290-464) Peptidase_M4_C (467-637)	P04275	PF01826	TIL	von Willebrand factor	Blood coagulation, Cell adhesion	Secreted, extracellular matrix	Plasma	3SSB	0.447	0.3	Reasonable	0.9	0.63
Q72UH3	LIC_10684	Putative cytochrome c	Electron carrier activity (putative)	Periplasmic space-predicted	PF13442	Cytochrome_CBB3 (28-112)	P00450	PF07732, PF00394	Cu-oxidase_3, Cu-oxidase	Ceruloplasmin	Iron transport, copper transport	Secreted, extracellular space	Expressed by the liver and secreted in plasma.	2ZON	0.363	0.31	Reasonable	0.7	0.67
Q72UH3	LIC_10684	Putative cytochrome c	Electron carrier activity (putative)	Periplasmic space-predicted	PF13442	Cytochrome_CBB3 (28-112)	P00451	PF07732, PF00394	Cu-oxidase_3, Cu-oxidase	Coagulation factor VIII	Blood coagulation, hemostasis	Secreted, extracellular space	Widely expressed	2ZON	0.36	0.3	Reasonable	0.7	0.69
Q72UH3	LIC_10684	Putative cytochrome c	Electron carrier activity (putative)	Periplasmic space-predicted	PF13442	Cytochrome_CBB3 (28-112)	P12259	PF07732	Cu-oxidase_3	Coagulation factor V	Blood coagulation, hemostasis	Secreted, extracellular space	Plasma	2ZON	0.36	0.19	Medium	0.7	0.7
Q72QQ3	LIC_12060	Histidine kinase	Two-component regulatory system	OMP-predicted	PF00072	Response_reg	Q86TV6	PF13424	TPR_12	Tetratricopeptide repeat protein 7B	Protein localization to plasma membrane	Cytoplasm, Cell membrane	Widely expressed	3Q15	0.33	0.19	Medium	0.62	0.68
Q72SF1	LIC_11432	Histidine kinase response regulator hybrid protein	Kinase	OMP-predicted	PF00072	Response_reg	Q86TV6	PF13424	TPR_12	Tetratricopeptide repeat protein 7B	Protein localization to plasma membrane	Cytoplasm, Cell membrane	Widely expressed	3Q15	0.22	0.19	Low	0.63	0.68
Q72UV0	LIC_10557	Response regulator	Two-component regulatory system	Secreted	PF00072	Response_reg	Q86TV6	PF13424	TPR_12	Tetratricopeptide repeat protein 7B	Protein localization to plasma membrane	Cytoplasm, Cell membrane	Widely expressed	3Q15	0.15	0.19	Low	0.62	0.68
Q75FE0	LIC_20254	Response regulator	Two-component regulatory system	Secreted	PF00072	Response_reg	Q86TV6	PF13424	TPR_12	Tetratricopeptide repeat protein 7B	Protein localization to plasma membrane	Cytoplasm, Cell membrane	Widely expressed	3Q15	0.33	0.19	Medium	0.65	0.68
Q72S54	LIC_11532	Flagellin	Bacterial-type flagellum-dependent cell motility	Extracellular-predicted	PF00669	Flagellin_N	O75093	PF13855	LRR_8	Slit homolog 1 protein	Neurogenesis	Secreted, extracellular matrix	Predominantly expressed in adult forebrain. Expressed in fetal brain, lung and kidney	3V47	0.44	0.39	Reasonable	0.75	0.71
Q72S54	LIC_11532	Flagellin	Bacterial-type flagellum-dependent cell motility	Extracellular-predicted	PF00669	Flagellin_N	P02750	PF13855	LRR_8	Leucine-rich alpha-2-glycoprotein	Endothelial cell proliferation	Secreted, extracellular matrix	Plasma	3V47	0.44	0.35	Reasonable	0.75	0.68
Q72S54	LIC_11532	Flagellin	Bacterial-type flagellum-dependent cell motility	Extracellular-predicted	PF00669	Flagellin_N	P07359	PF13855	LRR_8	Platelet glycoprotein Ib alpha chain	Blood coagulation, Cell adhesion	Cell surface, plasma membrane	Expressed in platelets and megakaryocytes, tissue specificity: bone marrow, spleen and brain	3V47	0.44	0.37	Reasonable	0.75	0.69
Q72S54	LIC_11532	Flagellin	Bacterial-type flagellum-dependent cell motility	Extracellular-predicted	PF00669	Flagellin_N	P14770	PF13855	LRR_8	Platelet glycoprotein IX	Blood coagulation, Cell adhesion	Cell surface, plasma membrane	Expressed in thrombocytes, tissue specificity: bone marrow and spleen.	3V47	0.44	0.4	Reasonable	0.75	0.72
Q72S54	LIC_11532	Flagellin	Bacterial-type flagellum-dependent cell motility	Extracellular-predicted	PF00669	Flagellin_N	P35858	PF13855	LRR_8	Insulin-like growth factor-binding protein complex acid labile subunit	Cell adhesion	Secreted, extracellular space	Plasma	3V47	0.44	0.384	Reasonable	0.75	0.67
Q72S54	LIC_11532	Flagellin	Bacterial-type flagellum-dependent cell motility	Extracellular-predicted	PF00669	Flagellin_N	P40197	PF13855	LRR_8	Platelet glycoprotein V	Blood coagulation, Cell adhesion	Cell surface, plasma membrane	Expressed in platelets and megakaryocytes	3V47	0.44	0.377	Reasonable	0.75	0.66
Q72S54	LIC_11532	Flagellin	Bacterial-type flagellum-dependent cell motility	Extracellular-predicted	PF00669	Flagellin_N	P51884	PF13855	LRR_8	Lumican	Binds to laminin. Extracellular matrix structural constituent	Secreted, extracellular matrix	Widely expressed, tissue enhanced- gall bladder	3V47	0.44	0.385	Reasonable	0.75	0.68
Q72S54	LIC_11532	Flagellin	Bacterial-type flagellum-dependent cell motility	Extracellular-predicted	PF00669	Flagellin_N	Q8TF66	PF13855	LRR_8	Leucine-rich repeat-containing protein 15	Binds to laminin, collagen, fibronectin. Signal transduction	Cell membrane, extracellular exosome	Widely expressed, tissue enhanced- brain and placenta	3V47	0.44	0.4	Reasonable	0.75	0.72

## Sheet: S1(b)
Supplementary Table S1(b): Details on interactions predicted between proteins of L. biflexa and human host
Uniprot ID	Gene name	Protein description	Function	Subcellular localization	Pfam/SCOP acc. no.	Pfam/SCOP domain (region)	UniProt ID of interacting human protein	Pfam/SCOP acc. no.	Pfam/SCOP domain	Protein description	Function	Subcellular localization	Tissue specificity	Template complex
B0SRV8	LEPBI_I3432	TonB-dependent receptor protein putative signal peptide	Transport	Outer membrane	PF00593, PF07715	TonB_dep_Rec, Plug	P02787	PF00405	Transferrin	Serotransferrin	Iron transport	Membrane; secreted	Liver and plasma	3V8X
B0SRV8	LEPBI_I3432	TonB-dependent receptor protein putative signal peptide	Transport	Outer membrane	PF00593, PF07715	TonB_dep_Rec, Plug	P02788	PF00405	Transferrin	Lactotransferrin	Iron transport	Secreted	Expressed in brain, testis and peripheral blood leukocytes, High levels are found in saliva and tears, intermediate levels in serum and plasma, and low levels in urine. In kidney, detected in the distal collecting tubules in the medulla but not in the cortical region or in blood vessels	3V8X
B0SRV8	LEPBI_I3432	TonB-dependent receptor protein putative signal peptide	Transport	Outer membrane	PF00593, PF07715	TonB_dep_Rec, Plug	P08582	PF00405	Transferrin	Melanotransferrin	Iron transport	Cell membrane	Liver, epithelium, placenta, umbilical cord and sweat glands	3V8X
B0SMW4	LEPBI_I2760	Putative TonB-dependent receptor protein	Transport	Outer membrane	PF00593, PF07715	TonB_dep_Rec, Plug	P02787	PF00405	Transferrin	Serotransferrin	Iron transport	Membrane; secreted	Liver and plasma	3V8X
B0SMW4	LEPBI_I2760	Putative TonB-dependent receptor protein	Transport	Outer membrane	PF00593, PF07715	TonB_dep_Rec, Plug	P02788	PF00405	Transferrin	Lactotransferrin	Iron transport	Secreted	Expressed in brain, testis and peripheral blood leukocytes, High levels are found in saliva and tears, intermediate levels in serum and plasma, and low levels in urine. In kidney, detected in the distal collecting tubules in the medulla but not in the cortical region or in blood vessels	3V8X
B0SMW4	LEPBI_I2760	Putative TonB-dependent receptor protein	Transport	Outer membrane	PF00593, PF07715	TonB_dep_Rec, Plug	P08582	PF00405	Transferrin	Melanotransferrin	Iron transport	Cell membrane	Liver, epithelium, placenta, umbilical cord and sweat glands	3V8X
B0SUE8	LEPBI_p0018	Putative TonB-dependent outer membrane receptor	Transport	Outer membrane	PF00593, PF07715	TonB_dep_Rec, Plug	P02787	PF00405	Transferrin	Serotransferrin	Iron transport	Membrane; secreted	Liver and plasma	3V8X
B0SUE8	LEPBI_p0018	Putative TonB-dependent outer membrane receptor	Transport	Outer membrane	PF00593, PF07715	TonB_dep_Rec, Plug	P02788	PF00405	Transferrin	Lactotransferrin	Iron transport	Secreted	Expressed in brain, testis and peripheral blood leukocytes, High levels are found in saliva and tears, intermediate levels in serum and plasma, and low levels in urine. In kidney, detected in the distal collecting tubules in the medulla but not in the cortical region or in blood vessels	3V8X
B0SUE8	LEPBI_p0018	Putative TonB-dependent outer membrane receptor	Transport	Outer membrane	PF00593, PF07715	TonB_dep_Rec, Plug	P08582	PF00405	Transferrin	Melanotransferrin	Iron transport	Cell membrane	Liver, epithelium, placenta, umbilical cord and sweat glands	3V8X
B0SRD4	LEPBI_I3362	TonB-dependent receptor protein putative signal peptide	Transport	Outer membrane	PF00593, PF07715	TonB_dep_Rec, Plug	P02787	PF00405	Transferrin	Serotransferrin	Iron transport	Membrane; secreted	Liver and plasma	3V8X
B0SRD4	LEPBI_I3362	TonB-dependent receptor protein putative signal peptide	Transport	Outer membrane	PF00593, PF07715	TonB_dep_Rec, Plug	P02788	PF00405	Transferrin	Lactotransferrin	Iron transport	Secreted	Expressed in brain, testis and peripheral blood leukocytes, High levels are found in saliva and tears, intermediate levels in serum and plasma, and low levels in urine. In kidney, detected in the distal collecting tubules in the medulla but not in the cortical region or in blood vessels	3V8X
B0SRD4	LEPBI_I3362	TonB-dependent receptor protein putative signal peptide	Transport	Outer membrane	PF00593, PF07715	TonB_dep_Rec, Plug	P08582	PF00405	Transferrin	Melanotransferrin	Iron transport	Cell membrane	Liver, epithelium, placenta, umbilical cord and sweat glands	3V8X
B0SS97	fecA, LEPBI_I1883	Iron(III) dicitrate TonB-dependent receptor putative signal peptide	Transport	Outer membrane	PF00593, PF07715	TonB_dep_Rec, Plug	P02787	PF00405	Transferrin	Serotransferrin	Iron transport	Membrane; secreted	Liver and plasma	3V8X
B0SS97	fecA, LEPBI_I1883	Iron(III) dicitrate TonB-dependent receptor putative signal peptide	Transport	Outer membrane	PF00593, PF07715	TonB_dep_Rec, Plug	P02788	PF00405	Transferrin	Lactotransferrin	Iron transport	Secreted	Expressed in brain, testis and peripheral blood leukocytes, High levels are found in saliva and tears, intermediate levels in serum and plasma, and low levels in urine. In kidney, detected in the distal collecting tubules in the medulla but not in the cortical region or in blood vessels	3V8X
B0SS97	fecA, LEPBI_I1883	Iron(III) dicitrate TonB-dependent receptor putative signal peptide	Transport	Outer membrane	PF00593, PF07715	TonB_dep_Rec, Plug	P08582	PF00405	Transferrin	Melanotransferrin	Iron transport	Cell membrane	Liver, epithelium, placenta, umbilical cord and sweat glands	3V8X
B0SJ68	LEPBI_I0500	Putative TonB-dependent outer membrane receptor putative signal peptide	Transport	Outer membrane	PF07715	Plug	P02787	PF00405	Transferrin	Serotransferrin	Iron transport	Membrane; secreted	Liver and plasma	3V8X
B0SJ68	LEPBI_I0500	Putative TonB-dependent outer membrane receptor putative signal peptide	Transport	Outer membrane	PF07715	Plug	P02788	PF00405	Transferrin	Lactotransferrin	Iron transport	Secreted	Expressed in brain, testis and peripheral blood leukocytes, High levels are found in saliva and tears, intermediate levels in serum and plasma, and low levels in urine. In kidney, detected in the distal collecting tubules in the medulla but not in the cortical region or in blood vessels	3V8X
B0SJ68	LEPBI_I0500	Putative TonB-dependent outer membrane receptor putative signal peptide	Transport	Outer membrane	PF07715	Plug	P08582	PF00405	Transferrin	Melanotransferrin	Iron transport	Cell membrane	Liver, epithelium, placenta, umbilical cord and sweat glands	3V8X
B0SRC6	LEPBI_I3354	Uncharacterized protein	Not known	Outer membrane	PF07715	Plug	P02787	PF00405	Transferrin	Serotransferrin	Iron transport	Membrane; secreted	Liver and plasma	3V8X
B0SRC6	LEPBI_I3354	Uncharacterized protein	Not known	Outer membrane	PF07715	Plug	P02788	PF00405	Transferrin	Lactotransferrin	Iron transport	Secreted	Expressed in brain, testis and peripheral blood leukocytes, High levels are found in saliva and tears, intermediate levels in serum and plasma, and low levels in urine. In kidney, detected in the distal collecting tubules in the medulla but not in the cortical region or in blood vessels	3V8X
B0SRC6	LEPBI_I3354	Uncharacterized protein	Not known	Outer membrane	PF07715	Plug	P08582	PF00405	Transferrin	Melanotransferrin	Iron transport	Cell membrane	Liver, epithelium, placenta, umbilical cord and sweat glands	3V8X
B0SPH7	LEPBI_I3017	Uncharacterized protein	Not known	Outer membrane	PF07715	Plug	P02787	PF00405	Transferrin	Serotransferrin	Iron transport	Membrane; secreted	Liver and plasma	3V8X
B0SPH7	LEPBI_I3017	Uncharacterized protein	Not known	Outer membrane	PF07715	Plug	P02788	PF00405	Transferrin	Lactotransferrin	Iron transport	Secreted	Expressed in brain, testis and peripheral blood leukocytes, High levels are found in saliva and tears, intermediate levels in serum and plasma, and low levels in urine. In kidney, detected in the distal collecting tubules in the medulla but not in the cortical region or in blood vessels	3V8X
B0SPH7	LEPBI_I3017	Uncharacterized protein	Not known	Outer membrane	PF07715	Plug	P08582	PF00405	Transferrin	Melanotransferrin	Iron transport	Cell membrane	Liver, epithelium, placenta, umbilical cord and sweat glands	3V8X
B0SS86	flaB4, LEPBI_I1872	Flagellin	Bacterial-type flagellum-dependent cell motility	Outer membrane	PF00669	Flagellin	P02750	PF13855	LRR_8	Leucine-rich alpha-2-glycoprotein	Endothelial cell proliferation	Secreted, extracellular matrix	Plasma	3V47
B0SS86	flaB4, LEPBI_I1872	Flagellin	Bacterial-type flagellum-dependent cell motility	Outer membrane	PF00669	Flagellin	P35858	PF13855	LRR_8	Insulin-like growth factor-binding protein complex acid labile subunit	Cell adhesion	Secreted, extracellular space	Plasma	3V47
B0SS86	flaB4, LEPBI_I1872	Flagellin	Bacterial-type flagellum-dependent cell motility	Outer membrane	PF00669	Flagellin	P40197	PF13855	LRR_8	Platelet glycoprotein V	Blood coagulation, Cell adhesion	Cell surface, plasma membrane	Expressed in platelets and megakaryocytes	3V47
B0SS86	flaB4, LEPBI_I1872	Flagellin	Bacterial-type flagellum-dependent cell motility	Outer membrane	PF00669	Flagellin	P51884	PF13855	LRR_8	Lumican	Binds to laminin. Extracellular matrix structural constituent	Secreted, extracellular matrix	Widely expressed, tissue enhanced- gall bladder	3V47
B0SS86	flaB4, LEPBI_I1872	Flagellin	Bacterial-type flagellum-dependent cell motility	Outer membrane	PF00669	Flagellin	O75093	PF13855	LRR_8	Slit homolog 1 protein	Neurogenesis	Secreted, extracellular matrix	Predominantly expressed in adult forebrain. Expressed in fetal brain, lung and kidney	3V47
B0SS86	flaB4, LEPBI_I1872	Flagellin	Bacterial-type flagellum-dependent cell motility	Outer membrane	PF00700	Flagellin_C	Q8TDW0	PF13306	Leucine-rich repeat	Volume-regulated anion channel subunit LRRC8C	anion channel	plasma membrane	Expressed at highest levels in skeletal muscle, and at moderate levels in heart, lung and peripheral blood leukocytes	3V47
B0SS86	flaB4, LEPBI_I1872	Flagellin	Bacterial-type flagellum-dependent cell motility	Outer membrane	PF00700	Flagellin_C	Q7Z5L7	PF13306	Leucine-rich repeat	Podocan	Negatively regulates cell proliferation and cell migration	extracellular space	Kidney, heart, liver, pancreas and vascular smooth muscle cells. Also detected in aortic intima (at protein level).	3V47
B0SS86	flaB4, LEPBI_I1872	Flagellin	Bacterial-type flagellum-dependent cell motility	Outer membrane	PF00700	Flagellin_C	Q9NYK1	PF13306	Leucine-rich repeat	Toll-like receptor 7	Key component of innate and adaptive immunity	plasma membrane	Detected in brain, placenta, spleen, stomach, small intestine, lung and in plasmacytoid pre-dendritic cells	3V47
B0SSZ5	flaB2, LEPBI_I2133	Flagellin	Bacterial-type flagellum-dependent cell motility	Secreted	PF00669	Flagellin	P02750	PF13855	LRR_8	Leucine-rich alpha-2-glycoprotein	Endothelial cell proliferation	Secreted, extracellular matrix	Plasma	3V47
B0SSZ5	flaB2, LEPBI_I2133	Flagellin	Bacterial-type flagellum-dependent cell motility	Secreted	PF00669	Flagellin	P35858	PF13855	LRR_8	Insulin-like growth factor-binding protein complex acid labile subunit	Cell adhesion	Secreted, extracellular space	Plasma	3V47
B0SSZ5	flaB2, LEPBI_I2133	Flagellin	Bacterial-type flagellum-dependent cell motility	Secreted	PF00669	Flagellin	P40197	PF13855	LRR_8	Platelet glycoprotein V	Blood coagulation, Cell adhesion	Cell surface, plasma membrane	Expressed in platelets and megakaryocytes	3V47
B0SSZ5	flaB2, LEPBI_I2133	Flagellin	Bacterial-type flagellum-dependent cell motility	Secreted	PF00669	Flagellin	P51884	PF13855	LRR_8	Lumican	Binds to laminin. Extracellular matrix structural constituent	Secreted, extracellular matrix	Widely expressed, tissue enhanced- gall bladder	3V47
B0SSZ5	flaB2, LEPBI_I2133	Flagellin	Bacterial-type flagellum-dependent cell motility	Secreted	PF00669	Flagellin	O75093	PF13855	LRR_8	Slit homolog 1 protein	Neurogenesis	Secreted, extracellular matrix	Predominantly expressed in adult forebrain. Expressed in fetal brain, lung and kidney	3V47
B0SSZ5	flaB2, LEPBI_I2133	Flagellin	Bacterial-type flagellum-dependent cell motility	Extracellular- predicted	PF00700	Flagellin_C	Q8TDW0	PF13306	Leucine-rich repeat	Volume-regulated anion channel subunit LRRC8C	anion channel	plasma membrane	Expressed at highest levels in skeletal muscle, and at moderate levels in heart, lung and peripheral blood leukocytes	3V47
B0SSZ5	flaB2, LEPBI_I2133	Flagellin	Bacterial-type flagellum-dependent cell motility	Extracellular- predicted	PF00700	Flagellin_C	Q7Z5L7	PF13306	Leucine-rich repeat	Podocan	Negatively regulates cell proliferation and cell migration	extracellular space	Kidney, heart, liver, pancreas and vascular smooth muscle cells. Also detected in aortic intima (at protein level).	3V47
B0SSZ5	flaB2, LEPBI_I2133	Flagellin	Bacterial-type flagellum-dependent cell motility	Extracellular- predicted	PF00700	Flagellin_C	Q9NYK1	PF13306	Leucine-rich repeat	Toll-like receptor 7	Key component of innate and adaptive immunity	plasma membrane	Detected in brain, placenta, spleen, stomach, small intestine, lung and in plasmacytoid pre-dendritic cells	3V47
B0SMP8	LEPBI_I2694	Putative cytochrome c putative signal peptide	Electron carrier activity (putative)	Periplasmic	PF13442	Cytochrome_CBB3	P00450	PF07732, PF00394	Cu-oxidase_3, Cu-oxidase	Ceruloplasmin	Iron transport, copper transport	Secreted, extracellular space	Expressed by the liver and secreted in plasma.	2ZON
B0SMP8	LEPBI_I2694	Putative cytochrome c putative signal peptide	Electron carrier activity (putative)	Periplasmic	PF13442	Cytochrome_CBB3	P00451	PF07732, PF00394	Cu-oxidase_3, Cu-oxidase	Coagulation factor VIII	Blood coagulation, hemostasis	Secreted, extracellular space	Widely expressed	2ZON
B0SMP8	LEPBI_I2694	Putative cytochrome c putative signal peptide	Electron carrier activity (putative)	Periplasmic	PF13442	Cytochrome_CBB3	P12259	PF07732	Cu-oxidase_3	Coagulation factor V	Blood coagulation, hemostasis	Secreted, extracellular space	Plasma	2ZON
B0SK10	LEPBI_I0424	Histidine kinase (EC 2.7.13.3)	Kinase	Outer membrane	PF00072	Response_reg	Q86TV6	PF13424	TPR_12	Tetratricopeptide repeat protein 7B	Protein localization to plasma membrane	Cytoplasm, Cell membrane	Widely expressed	3Q15
B0SQJ7	LEPBI_I1548	Histidine kinase (EC 2.7.13.3)	Kinase	Outer membrane	PF00072	Response_reg	Q86TV6	PF13424	TPR_12	Tetratricopeptide repeat protein 7B	Protein localization to plasma membrane	Cytoplasm, Cell membrane	Widely expressed	3Q15
B0SMF5	LEPBI_I0975	Uncharacterized protein	Not known	Outer membrane	PF00072	Response_reg	Q86TV6	PF13424	TPR_12	Tetratricopeptide repeat protein 7B	Protein localization to plasma membrane	Cytoplasm, Cell membrane	Widely expressed	3Q15
B0SPG8	LEPBI_I3007	Putative sensor kinase (EC 3.1.1.61)	Kinase	Outer membrane	PF00072	Response_reg	Q86TV6	PF13424	TPR_12	Tetratricopeptide repeat protein 7B	Protein localization to plasma membrane	Cytoplasm, Cell membrane	Widely expressed	3Q15
B0SLF4	LEPBI_I2451	Putative two-component regulator	Kinase	Outer membrane	PF00072	Response_reg	Q86TV6	PF13424	TPR_12	Tetratricopeptide repeat protein 7B	Protein localization to plasma membrane	Cytoplasm, Cell membrane	Widely expressed	3Q15
B0SMF5	LEPBI_I0975	Uncharacterized protein	Not known	Outer membrane	PF00072	Response_reg	P07900	PF02518	HATPase_C	Heat shock protein HSP 90-alpha	Stress response	Cell membrane, Cytoplasm	Widely expressed	3DGE
B0SJX1	LEPBI_I0133	Uncharacterized protein	Not known	Extracellular- predicted	PF09864	MliC	P61626	PF00062	Glycoside hydrolase family/Lys	Lysozyme C	bacteriolytic function	extracellular space	Expressed in lung macrophages,bone marrow stem cells,salivary gland,stomach,intestine,kidney,lymph node and spleen	3F6Z
