# Supplementary material for: Comparison of Leptospira interrogans and Leptospira biflexa genomes: analysis of potential leptospiral–host interactions
Source: Royal Society of Chemistry journal article supplement (doi:10.1039/c6mb00856a), 2017-03-03
Supplement: c6mb00856a3.xlsx [file c6mb00856a3.xlsx]

## Sheet: Sheet1
Supplementary Table S2: Comparisons on leptospiral-host protein-protein interactions
A) Protein-protein interactions mediated by proteins of L. interrogans and L. biflexa with the same human protein
UniProt ID of human protein	Protein description	L. interrogans protein	Protein description	L. biflexa protein	Protein description
P00450	Ceruloplasmin	LIC_10684	Putative cytochrome c	LEPBI_I2694	Putative cytochrome c putative signal peptide
P00451	Coagulation factor VIII	LIC_10684	Putative cytochrome c	LEPBI_I2694	Putative cytochrome c putative signal peptide
P02750	Leucine-rich alpha-2-glycoprotein	LIC_11532	Flagellin	flaB2, LEPBI_I2133	Flagellin
P02750	Leucine-rich alpha-2-glycoprotein	-	-	flaB4, LEPBI_I1872	Flagellin
P02787	Serotransferrin	LIC_12998	TonB-dependent outer membrane receptor	LEPBI_I3432	TonB-dependent receptor protein putative signal peptide
P02787	Serotransferrin	btuB; LIC_12374	Outer membrane protein, TonB dependent	LEPBI_I2760	Putative TonB-dependent receptor protein
P02787	Serotransferrin	phuR; LIC_10964	TonB-dependent outer membrane hemin receptor	LEPBI_p0018	Putative TonB-dependent outer membrane receptor
P02787	Serotransferrin	smc, LIC_10714	Outer membrane receptor protein	LEPBI_I3362	TonB-dependent receptor protein putative signal peptide
P02787	Serotransferrin	LIC_20214	Uncharacterized protein	fecA, LEPBI_I1883	Iron(III) dicitrate TonB-dependent receptor putative signal peptide
P02787	Serotransferrin	LIC_11694	TonB-dependent outer membrane receptor	LEPBI_I0500	Putative TonB-dependent outer membrane receptor putative signal peptide
P02787	Serotransferrin	LIC_12898	Uncharacterized protein	LEPBI_I3354	Uncharacterized protein
P02787	Serotransferrin	fecA; LIC_10896	TonB-dependent outer membrane hemin receptor	LEPBI_I3017	Uncharacterized protein
P02788	Lactotransferrin	LIC_12998	TonB-dependent outer membrane receptor	LEPBI_I3432	TonB-dependent receptor protein putative signal peptide
P02788	Lactotransferrin	btuB; LIC_12374	Outer membrane protein, TonB dependent	LEPBI_I2760	Putative TonB-dependent receptor protein
P02788	Lactotransferrin	phuR; LIC_10964	TonB-dependent outer membrane hemin receptor	LEPBI_p0018	Putative TonB-dependent outer membrane receptor
P02788	Lactotransferrin	smc, LIC_10714	Outer membrane receptor protein	LEPBI_I3362	TonB-dependent receptor protein putative signal peptide
P02788	Lactotransferrin	LIC_20214	Uncharacterized protein	fecA, LEPBI_I1883	Iron(III) dicitrate TonB-dependent receptor putative signal peptide
P02788	Lactotransferrin	LIC_11694	TonB-dependent outer membrane receptor	LEPBI_I0500	Putative TonB-dependent outer membrane receptor putative signal peptide
P02788	Lactotransferrin	LIC_12898	Uncharacterized protein	LEPBI_I3354	Uncharacterized protein
P02788	Lactotransferrin	fecA; LIC_10896	TonB-dependent outer membrane hemin receptor	LEPBI_I3017	Uncharacterized protein
P02788	Lactotransferrin	LIC_10881	Outer membrane protein, TonB dependent	-	-
P08582	Melanotransferrin	LIC_12998	TonB-dependent outer membrane receptor	LEPBI_I3432	TonB-dependent receptor protein putative signal peptide
P08582	Melanotransferrin	btuB; LIC_12374	Outer membrane protein, TonB dependent	LEPBI_I2760	Putative TonB-dependent receptor protein
P08582	Melanotransferrin	phuR; LIC_10964	TonB-dependent outer membrane hemin receptor	LEPBI_p0018	Putative TonB-dependent outer membrane receptor
P08582	Melanotransferrin	smc, LIC_10714	Outer membrane receptor protein	LEPBI_I3362	TonB-dependent receptor protein putative signal peptide
P08582	Melanotransferrin	LIC_20214	Uncharacterized protein	fecA, LEPBI_I1883	Iron(III) dicitrate TonB-dependent receptor putative signal peptide
P08582	Melanotransferrin	LIC_11694	TonB-dependent outer membrane receptor	LEPBI_I0500	Putative TonB-dependent outer membrane receptor putative signal peptide
P08582	Melanotransferrin	LIC_12898	Uncharacterized protein	LEPBI_I3354	Uncharacterized protein
P08582	Melanotransferrin	fecA; LIC_10896	TonB-dependent outer membrane hemin receptor	LEPBI_I3017	Uncharacterized protein
P35858	Insulin-like growth factor-binding protein complex acid labile subunit	LIC_11532	Flagellin	flaB2, LEPBI_I2133	Flagellin
P35858	Insulin-like growth factor-binding protein complex acid labile subunit	-	-	flaB4, LEPBI_I1872	Flagellin
P40197	Platelet glycoprotein V	LIC_11532	Flagellin	flaB2, LEPBI_I2133	Flagellin
P40197	Platelet glycoprotein V	-	-	flaB4, LEPBI_I1872	Flagellin
P51884	Lumican	LIC_11532	Flagellin	flaB2, LEPBI_I2133	Flagellin
P51884	Lumican	-	-	flaB4, LEPBI_I1872	Flagellin
Q86TV6	TPR_12	LIC_12060	Histidine kinase	LEPBI_I0424	Histidine kinase (EC 2.7.13.3)
Q86TV6	TPR_12	LIC_11432	Histidine kinase response regulator hybrid protein	LEPBI_I1548	Histidine kinase (EC 2.7.13.3)
Q86TV6	TPR_12	LIC_10557	Response regulator	LEPBI_I0975	Uncharacterized protein
Q86TV6	TPR_12	LIC_20254	Response regulator	LEPBI_I3007	Putative sensor kinase (EC 3.1.1.61)
Q86TV6	TPR_12	-	-	LEPBI_I2451	Putative two-component regulator
B) Protein-protein interactions specifically brought about by either of the two species with human host
UniProt ID of human protein	Protein description	L. interrogans protein	Protein description
O75083	WD repeat-containing protein 1	LIC_20250	Peptidoglycan-associated cytoplasmic membrane protein
O75083	WD repeat-containing protein 1	LIC_13479	Peptidoglycan-associated cytoplasmic membrane protein
O75083	WD repeat-containing protein 1	LIC_10537	Peptidoglycan-associated periplasmic protein
O75083	WD repeat-containing protein 1	LIC_10191	Peptidoglycan-associated cytoplasmic membrane protein
O75083	WD repeat-containing protein 1	LIC_10050	Peptidoglycan-associated cytoplasmic membrane protein
P04275	von Willebrand factor	nprT; LIC_13322	Thermolysin
P04275	von Willebrand factor	LIC_13321	Thermolysin homolog
P04275	von Willebrand factor	LIC_13320	Thermolysin
P04275	von Willebrand factor	LIC_10715	Thermolysin
UniProt ID of human protein	Protein description	L. biflexa protein	Protein description
P07900	Heat shock protein HSP 90-alpha	LEPBI_I0975	Uncharacterized protein
P61626	Lysozyme C	LEPBI_I0133	Uncharacterized protein
Q7Z5L7	Podocan	flaB2, LEPBI_I2133	Flagellin
Q7Z5L7	Podocan	flaB4, LEPBI_I1872	Flagellin
Q8TDW0	Volume-regulated anion channel subunit LRRC8C	flaB2, LEPBI_I2133	Flagellin
Q8TDW0	Volume-regulated anion channel subunit LRRC8C	flaB4, LEPBI_I1872	Flagellin
Q9NYK1	Toll-like receptor 7	flaB2, LEPBI_I2133	Flagellin
Q9NYK1	Toll-like receptor 7	flaB4, LEPBI_I1872	Flagellin
